# Supplementary material for: Cooperative B–H activation by Cp* based κ2-N,S-chelated Ru(ii) and Mo(ii) complexes (Cp* = η5-C5Me5)
Source: Royal Society of Chemistry journal article supplement (doi:10.1039/d2dt00242f), 2022-01-01
Supplement: d2dt00242f1.pdf [file d2dt00242f1.pdf]

## **SUPPORTING INFORMATION**

### **Cooperative B-H activation Cp\* based $\kappa^2$ -N,S-chelated Ru(II) and Mo(II) complexes**

Suvam Saha,<sup>a</sup> Anagha Haridas,<sup>a</sup> Faneesha Assanar,<sup>a</sup> Charu Bansal,<sup>a</sup> P. K. Sudhadevi Antharjanam<sup>b</sup> and Sundargopal Ghosh <sup>\*a</sup>

<sup>a</sup>*Department of Chemistry, Indian Institute of Technology Madras, Chennai 600036, India.*

<sup>b</sup>*SAIF, Department of Chemistry, Indian Institute of Technology Madras, Chennai 600036, India.*

## I Table of Contents

### I Spectroscopic Details

|            |                                                                    |
|------------|--------------------------------------------------------------------|
| Figure S1  | ESI-MS of compound <b>1</b>                                        |
| Figure S2  | <sup>1</sup> H NMR spectrum of compound <b>1</b>                   |
| Figure S3  | <sup>31</sup> P{ <sup>1</sup> H} NMR spectrum of compound <b>1</b> |
| Figure S4  | ESI-MS of spectrum of compound <b>2</b>                            |
| Figure S5  | <sup>1</sup> H NMR spectrum of compound <b>2</b>                   |
| Figure S6  | ESI-MS of compound <b>3</b>                                        |
| Figure S7  | <sup>1</sup> H NMR spectrum of compound <b>3</b>                   |
| Figure S8  | <sup>11</sup> B{ <sup>1</sup> H} NMR spectrum of compound <b>3</b> |
| Figure S9  | <sup>13</sup> C{ <sup>1</sup> H} NMR spectrum of compound <b>3</b> |
| Figure S10 | ESI-MS of compound <b>4</b>                                        |
| Figure S11 | <sup>1</sup> H NMR spectrum of compound <b>4</b>                   |
| Figure S12 | <sup>11</sup> B{ <sup>1</sup> H} NMR spectrum of compound <b>4</b> |
| Figure S13 | <sup>13</sup> C{ <sup>1</sup> H} NMR spectrum of compound <b>4</b> |
| Figure S14 | <sup>19</sup> F NMR spectrum of compound <b>4</b>                  |
| Figure S15 | <sup>1</sup> H NMR spectrum of compound <b>6</b>                   |
| Figure S16 | <sup>11</sup> B{ <sup>1</sup> H} NMR spectrum of compound <b>6</b> |
| Figure S17 | ESI-MS of compound <b>7</b>                                        |
| Figure S18 | <sup>1</sup> H NMR spectrum of compound <b>7</b>                   |
| Figure S19 | <sup>11</sup> B{ <sup>1</sup> H} NMR spectrum of compound <b>7</b> |
| Figure S20 | <sup>13</sup> C{ <sup>1</sup> H} NMR spectrum of compound <b>7</b> |
| Figure S21 | <sup>19</sup> F NMR spectrum of compound <b>7</b>                  |
| Figure S22 | ESI-MS of compound <b>8</b>                                        |
| Figure S23 | <sup>1</sup> H NMR spectrum of compound <b>8</b>                   |
| Figure S24 | <sup>13</sup> C{ <sup>1</sup> H} NMR spectrum of compound <b>8</b> |
| Figure S25 | ESI-MS of compound <b>9</b>                                        |
| Figure S26 | <sup>1</sup> H NMR spectrum of compound <b>9</b>                   |
| Figure S27 | <sup>13</sup> C{ <sup>1</sup> H} NMR spectrum of compound <b>9</b> |

### II Computational Details

|            |                                                                                                                                                         |
|------------|---------------------------------------------------------------------------------------------------------------------------------------------------------|
| Table S1   | Experimental and DFT calculated <sup>11</sup> B chemical shifts $\delta$ (ppm) for compounds <b>3</b> , <b>4</b> , <b>6</b> and <b>7</b>                |
| Table S2   | Calculated natural charges (q), natural valence population (Pop) and HOMO–LUMO gaps of complexes <b>1-3</b> , <b>5,6</b> and <b>9</b>                   |
| Table S3   | Selected geometrical parameters and Wiberg bond indices (WBI) of <b>3</b> and <b>6</b>                                                                  |
| Table S4   | Topological parameters of <b>1</b> , <b>5</b> and <b>9</b>                                                                                              |
| Figure S28 | Contour-line map of the Laplacian of the electron density in the Mo-H-B plane of <b>6</b> and of the electron density in the Ta-N-C-S plane of <b>9</b> |

Figure S29      Optimized geometry of **3**

Figure S30      Optimized geometry of **6**

Figure S31      Optimized geometry of **9**

## I Spectroscopic Details

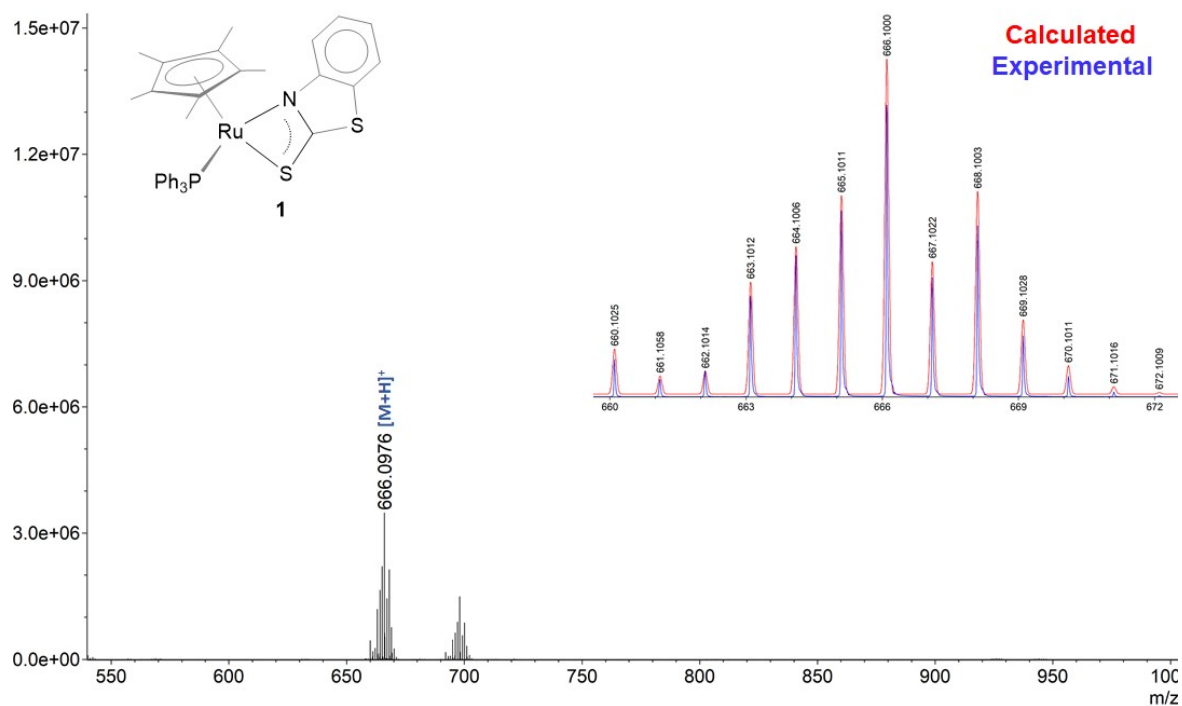

Figure S1. ESI-MS of compound 1

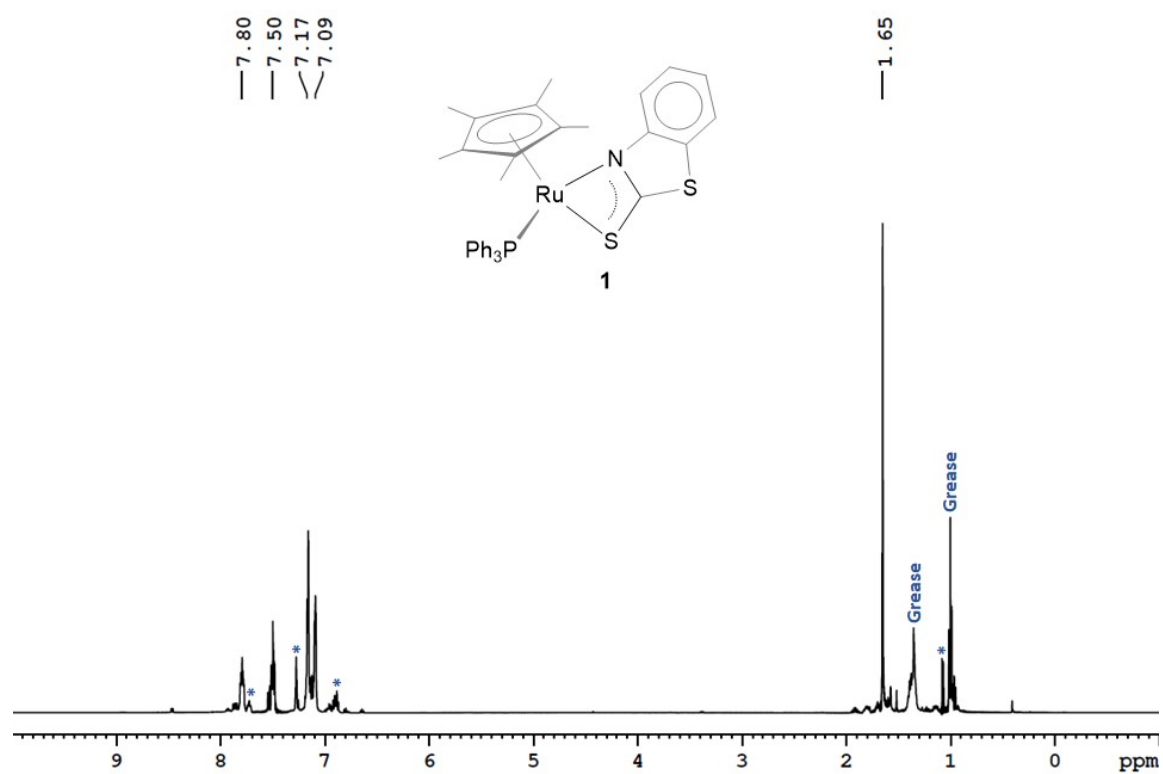

Figure S2. <sup>1</sup>H NMR spectrum of compound 1 (impure) in C<sub>6</sub>D<sub>6</sub> (\* = peaks corresponding to PPh<sub>3</sub> and other impurities)

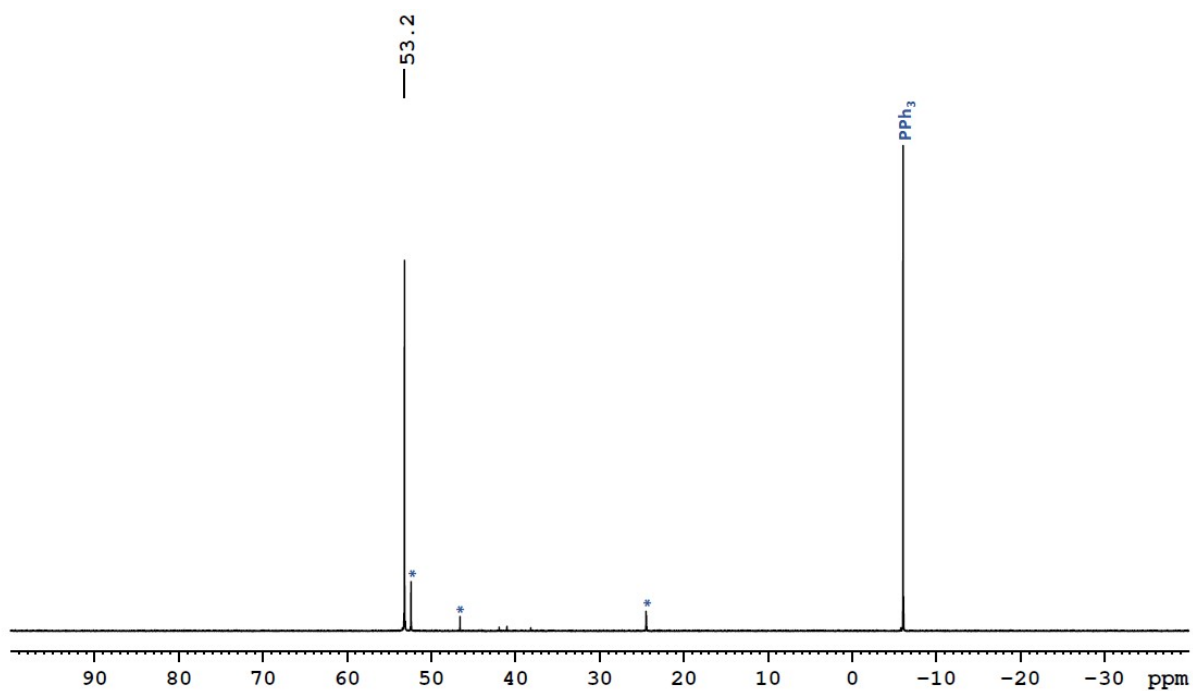

**Figure S3.** <sup>31</sup>P{<sup>1</sup>H} NMR spectrum of compound 1 (impure) in C<sub>6</sub>D<sub>6</sub> (\* = peaks corresponding some impurities)

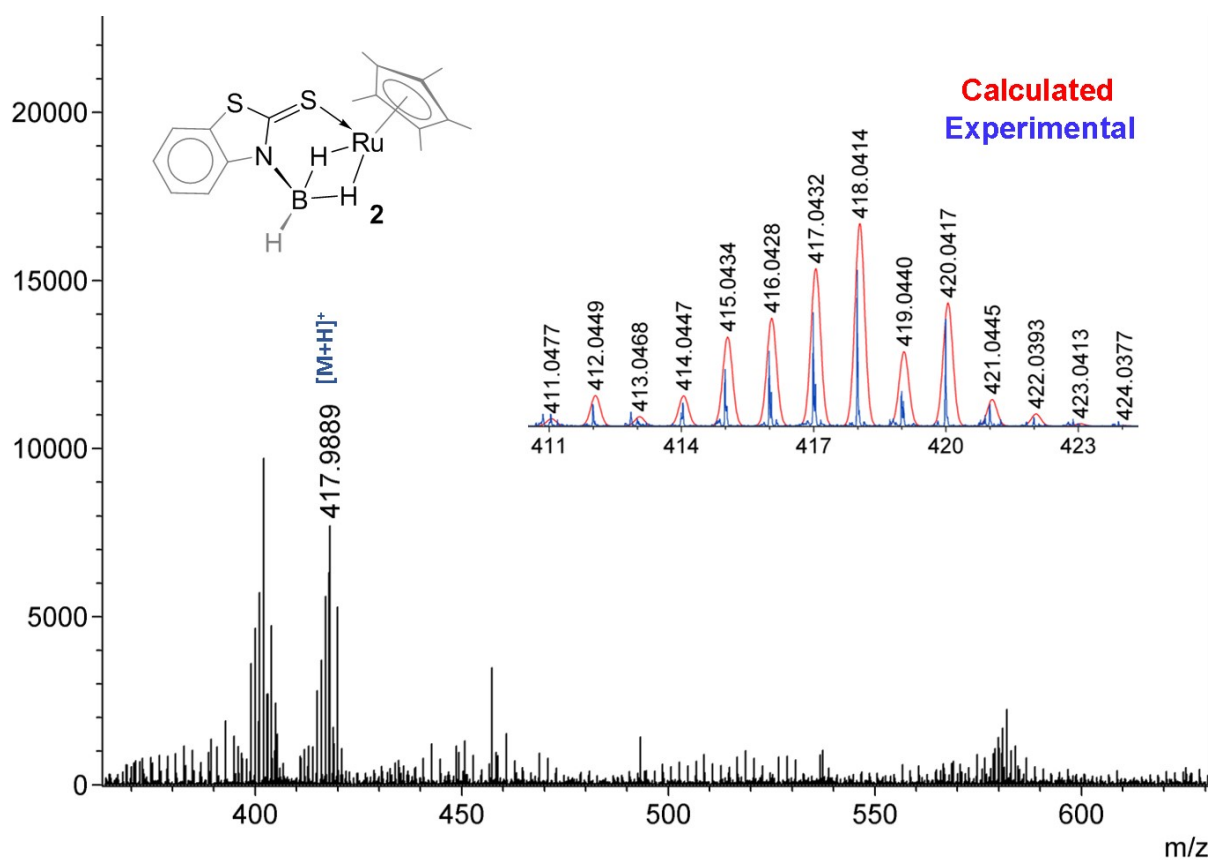

**Figure S4.** ESI-MS of compound 2

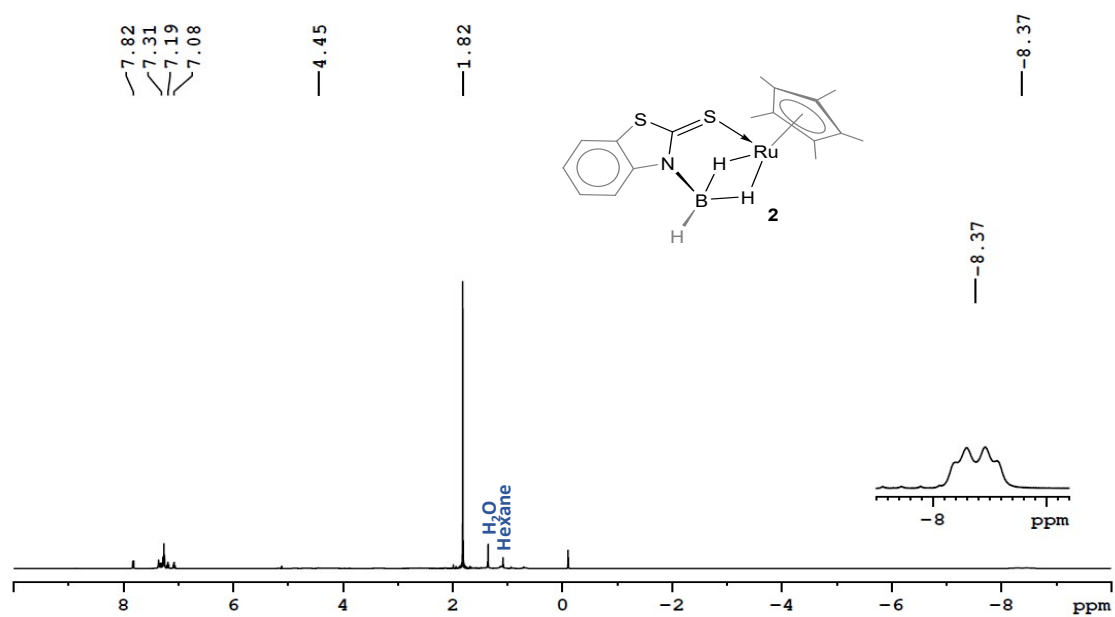

Figure S5.  $^1\text{H}$  NMR spectrum of compound 2 in  $\text{CDCl}_3$

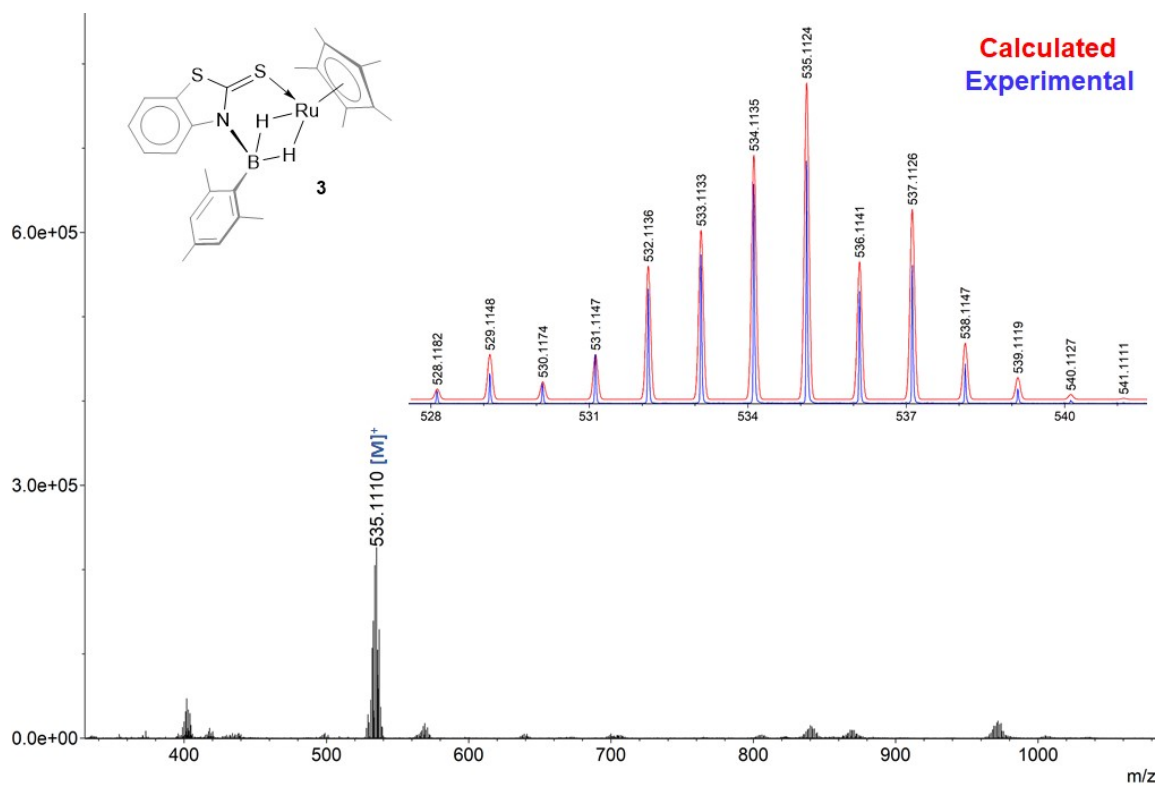

Figure S6. ESI-MS of compound 3

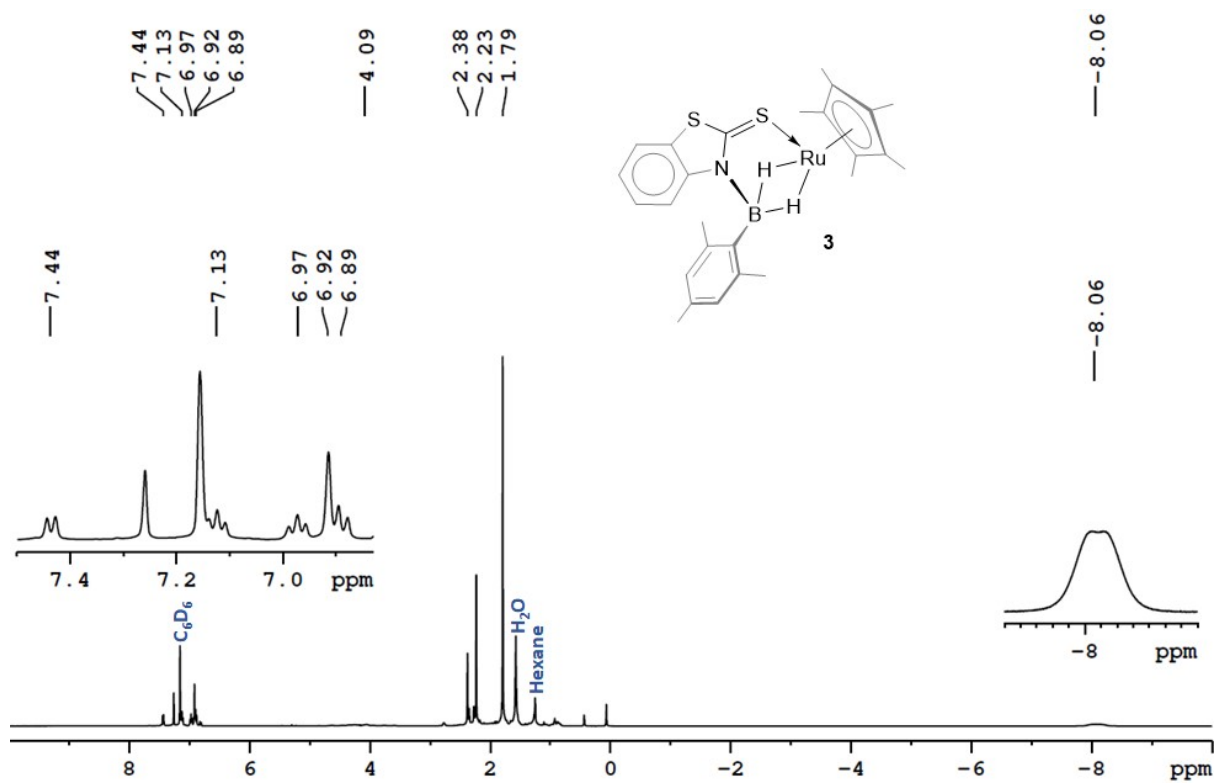

**Figure S7.**  $^1\text{H}$  NMR spectrum of compound **3** in  $\text{CDCl}_3$

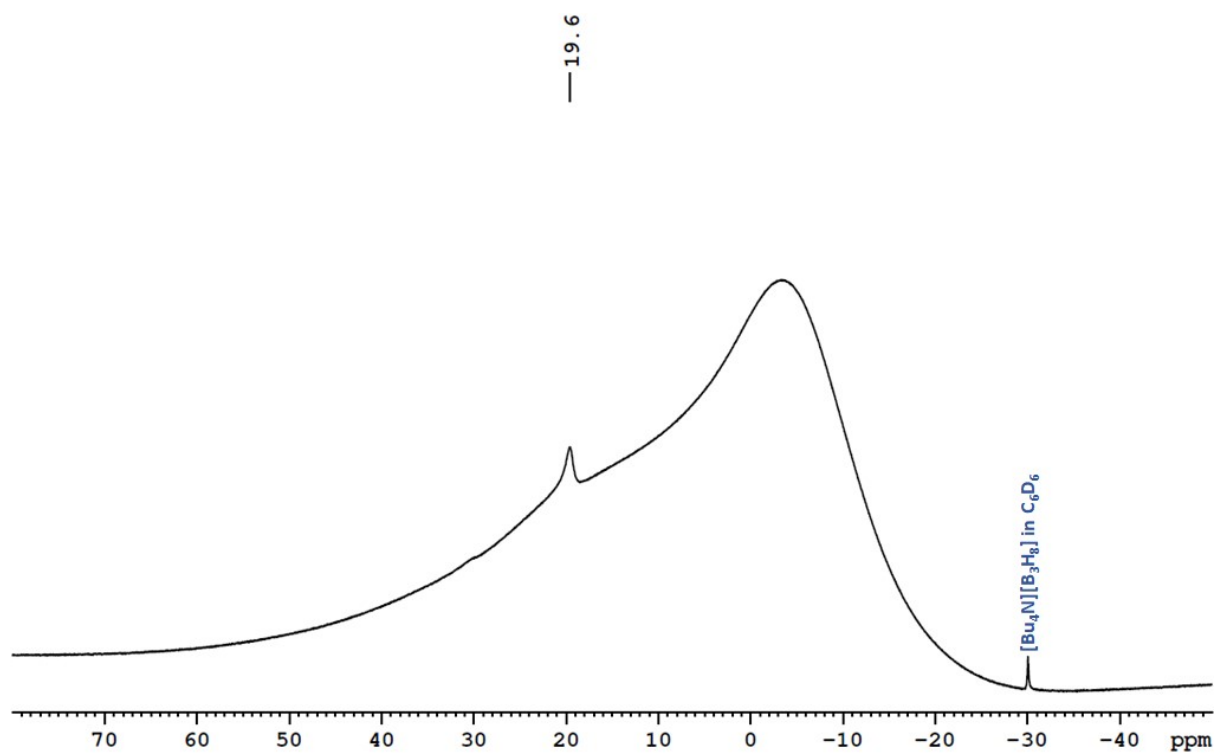

**Figure S8.**  $^{11}\text{B}\{^1\text{H}\}$  NMR spectrum of compound **3** in  $\text{CDCl}_3$

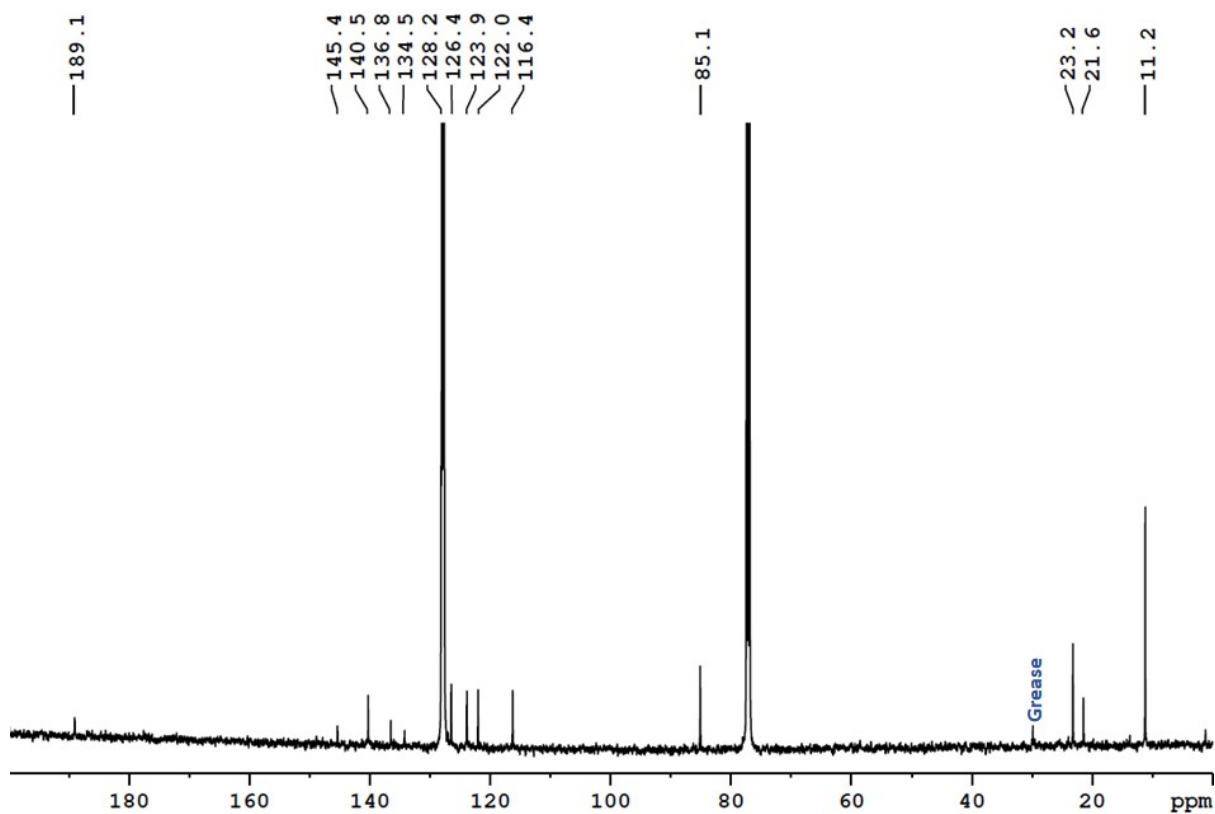

Figure S9.  $^{13}\text{C}\{^1\text{H}\}$  NMR spectrum of compound **3** in  $\text{CDCl}_3$

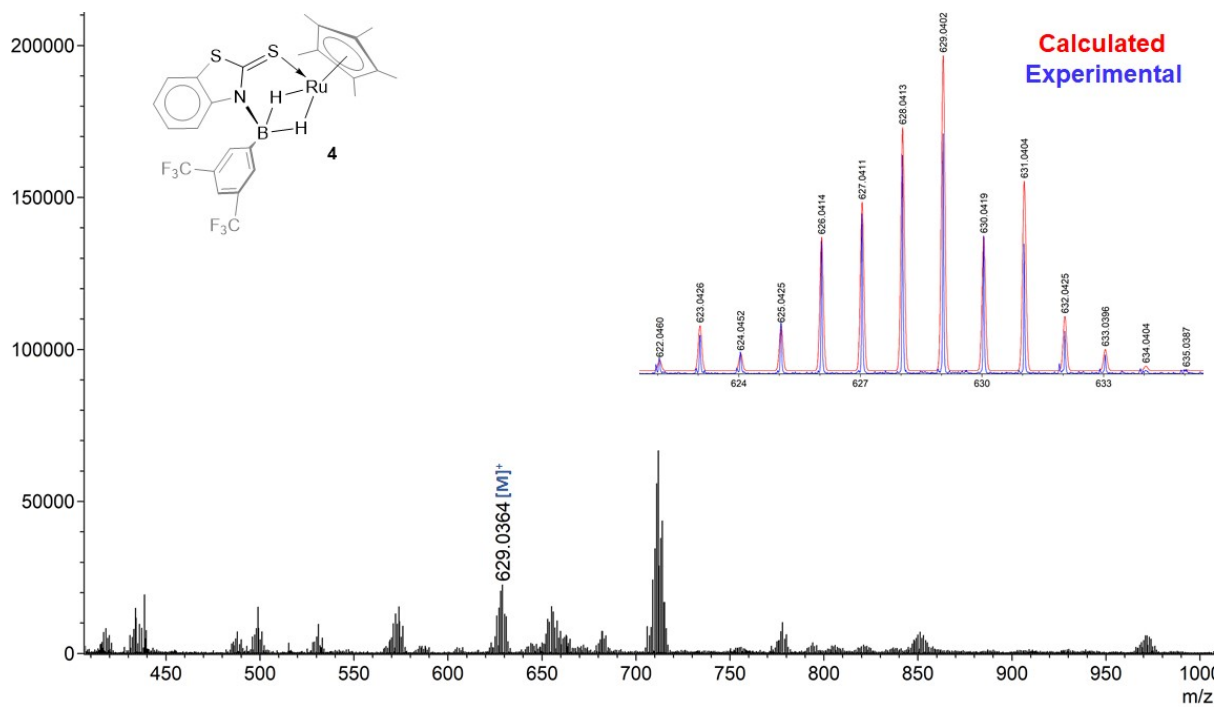

Figure S10. ESI-MS of compound **4**



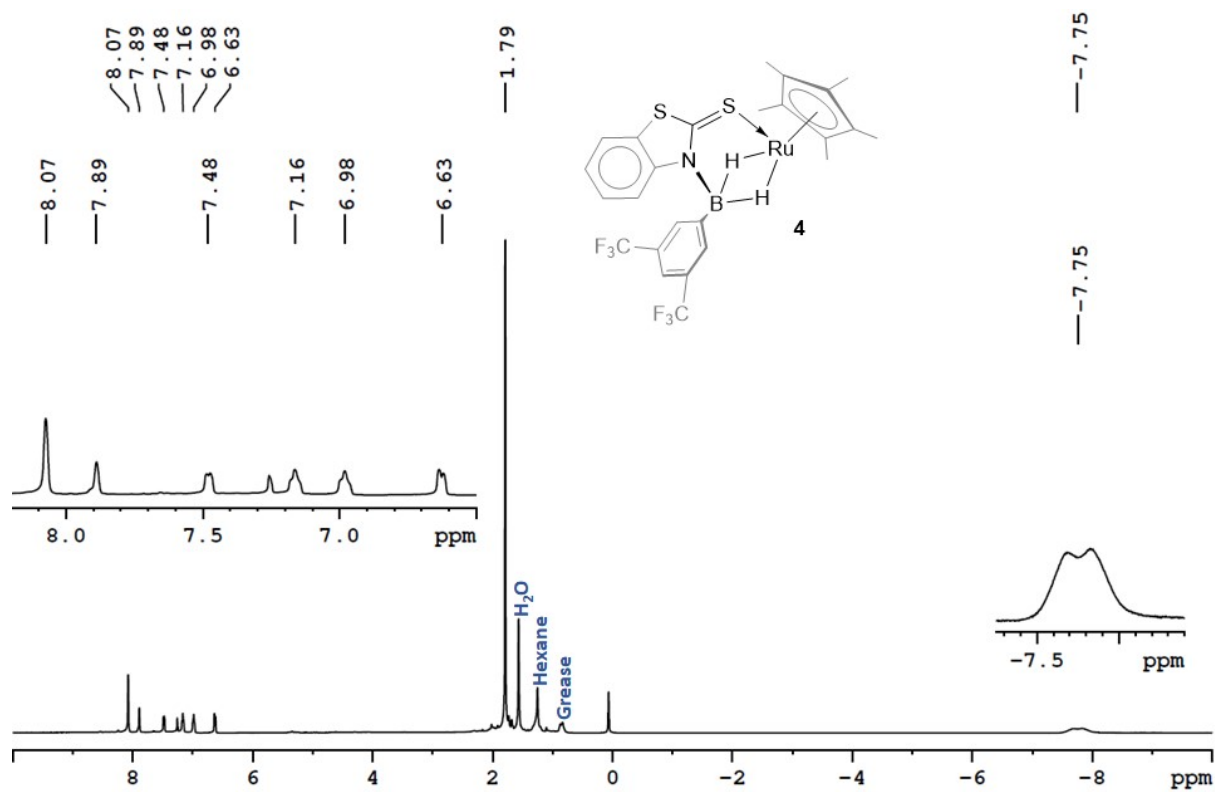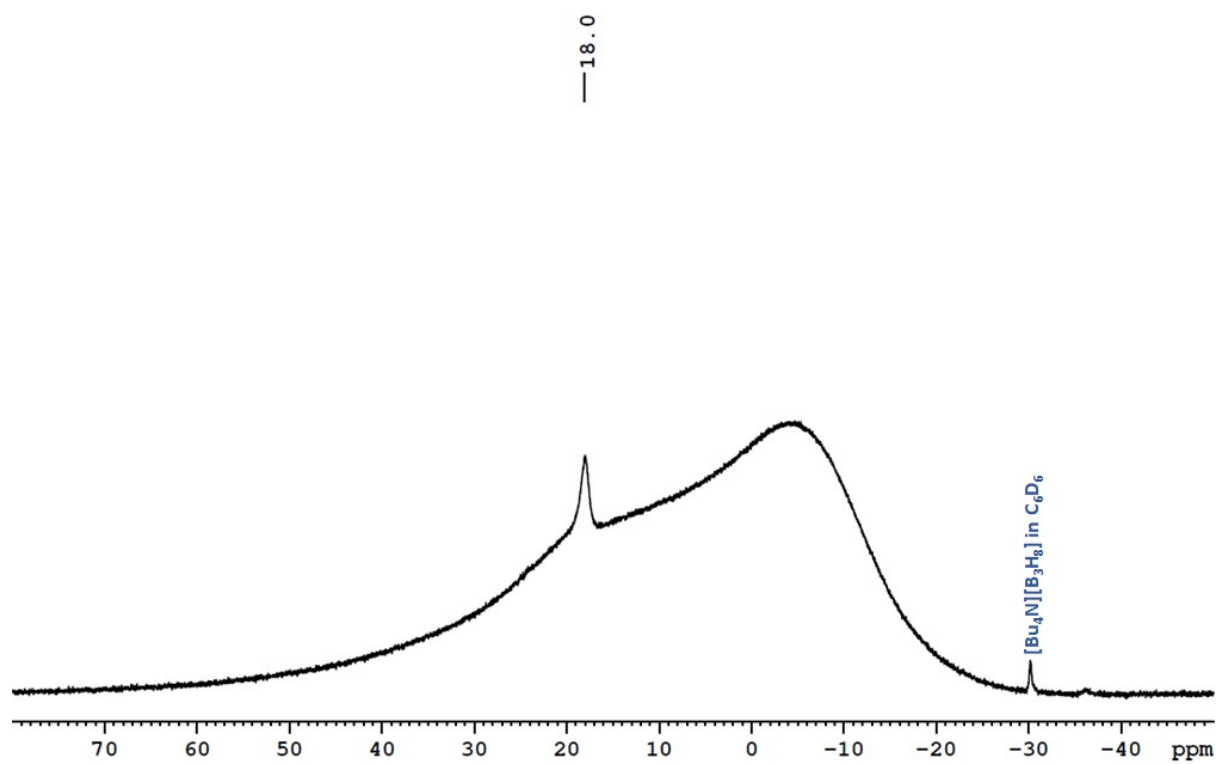

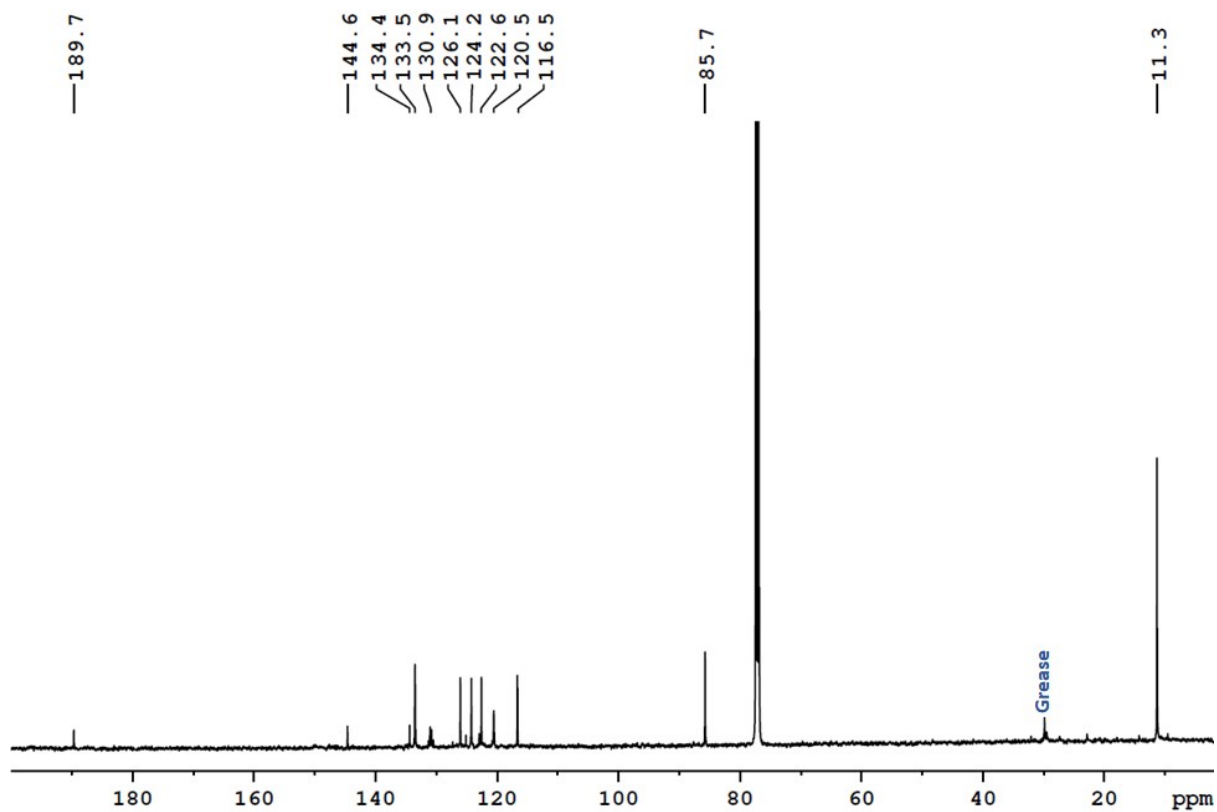

**Figure S13.**  $^{13}\text{C}\{^1\text{H}\}$  NMR spectrum of compound **4** in  $\text{C}_6\text{D}_6$

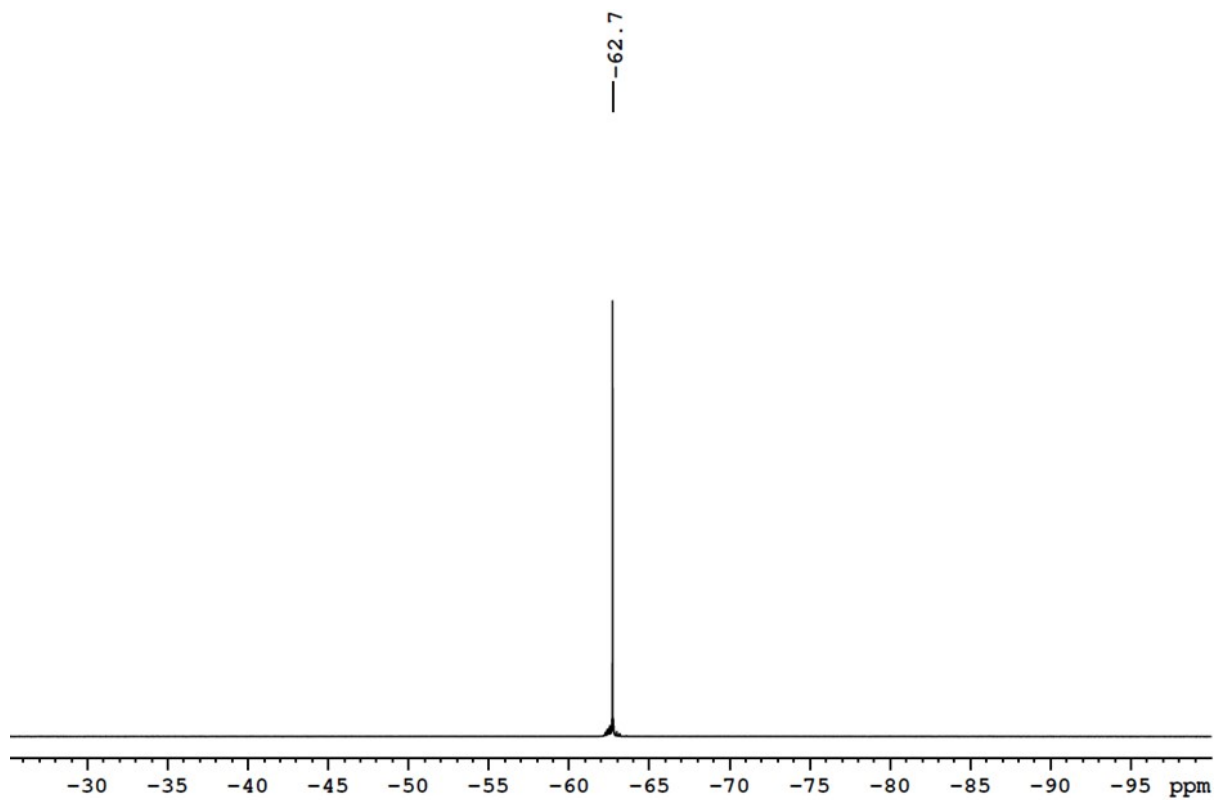

**Figure S14.**  $^{19}\text{F}$  NMR spectrum of compound **4** in  $\text{C}_6\text{D}_6$

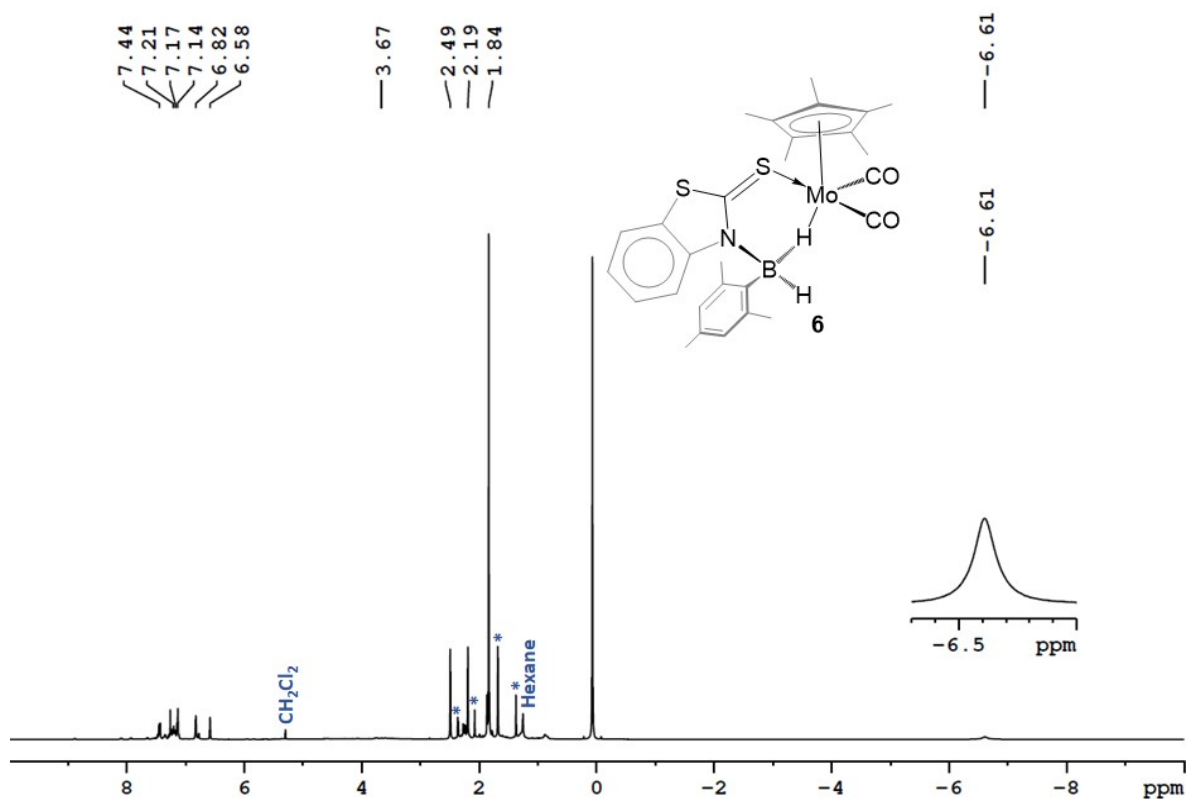

**Figure S15.** <sup>1</sup>H NMR spectrum of compound **6** (impure) in CDCl<sub>3</sub> (\* = peaks corresponding to inseparable impurities)

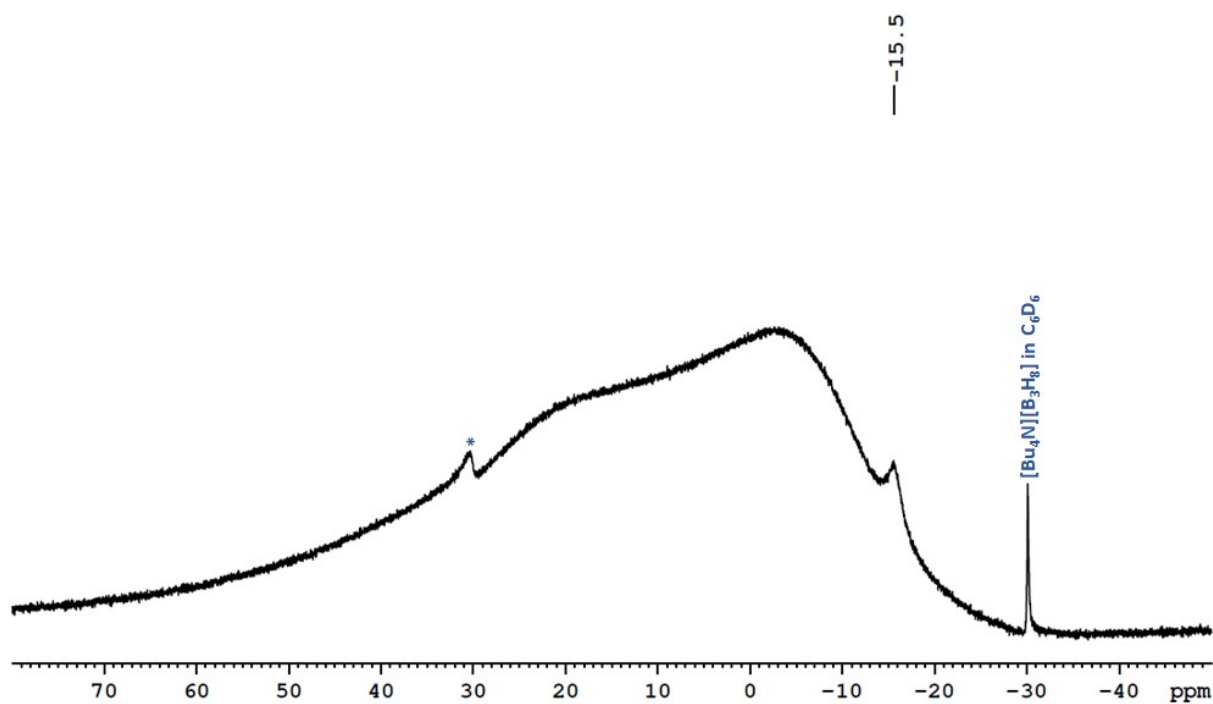

**Figure S16.** <sup>11</sup>B{<sup>1</sup>H} NMR spectrum of compound **6** (impure) in CDCl<sub>3</sub> (\* = peak corresponding to an inseparable impurity)

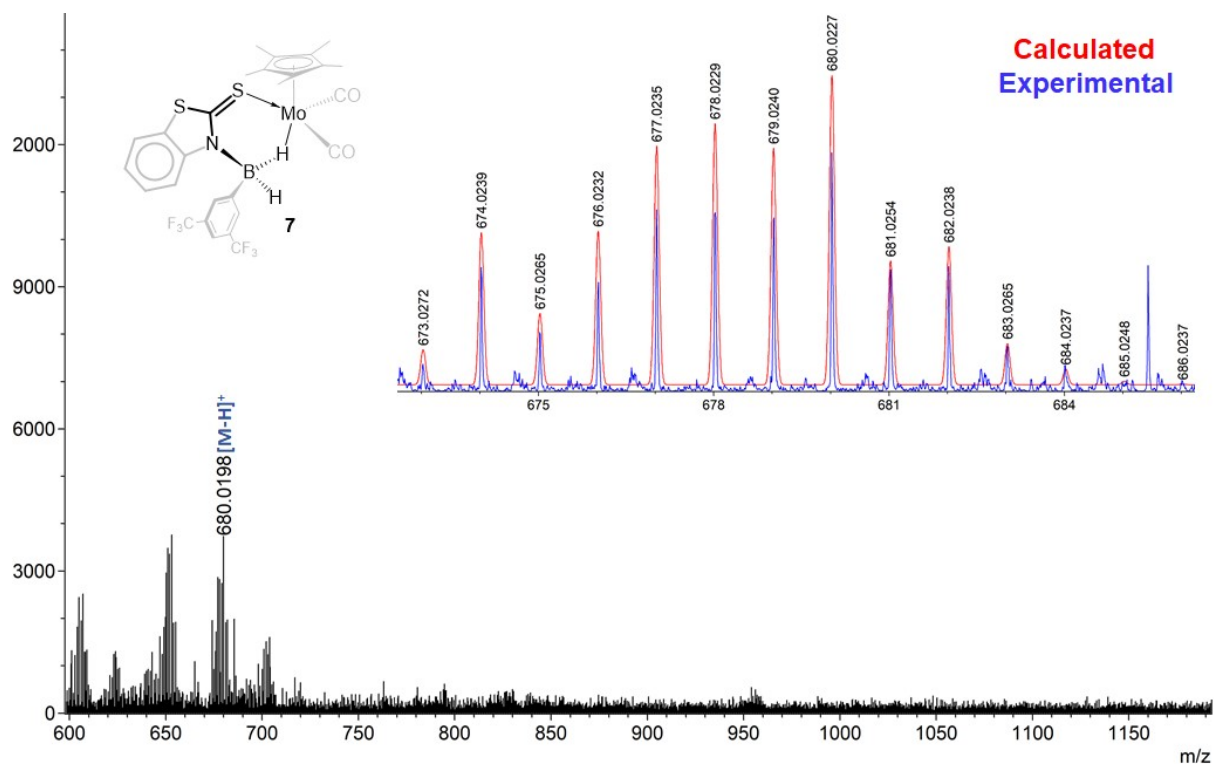

Figure S17. ESI-MS of compound 7

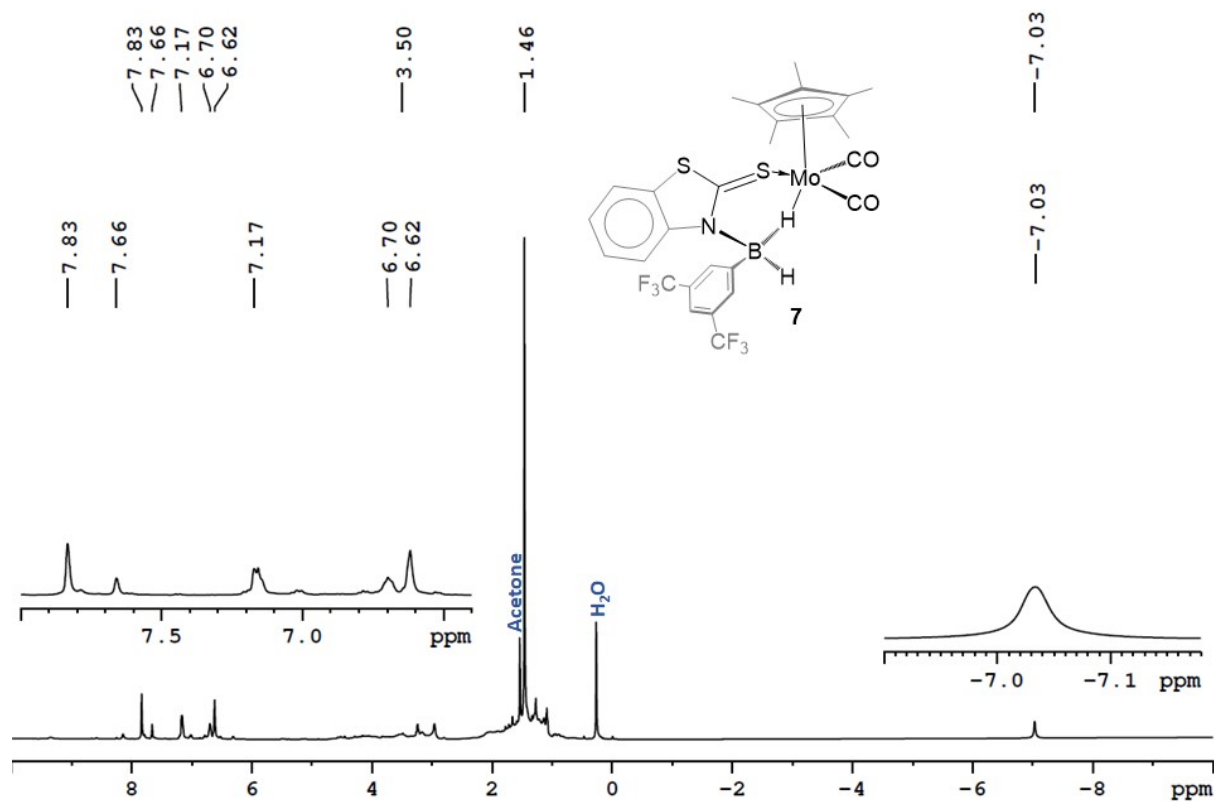

Figure S18.  $^1\text{H}$  NMR spectrum of compound 7 in  $\text{C}_6\text{D}_6$

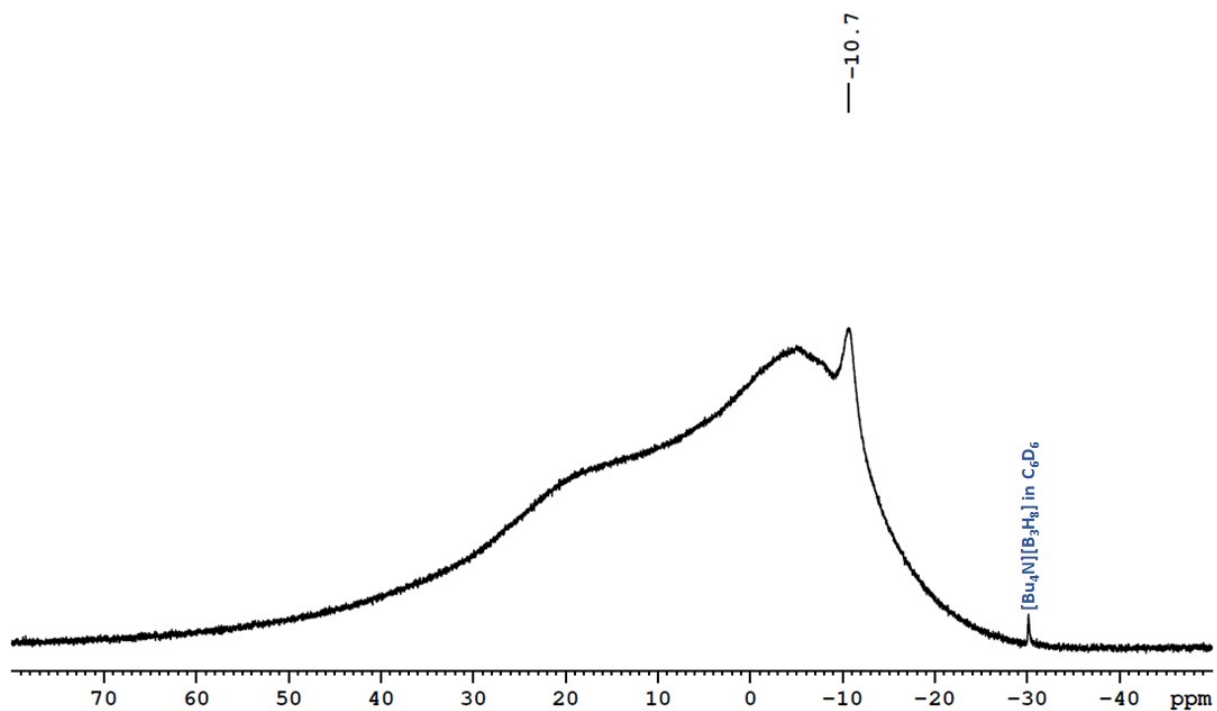

Figure S19.  $^{11}\text{B}\{^1\text{H}\}$  NMR spectrum of compound **7** in  $\text{C}_6\text{D}_6$

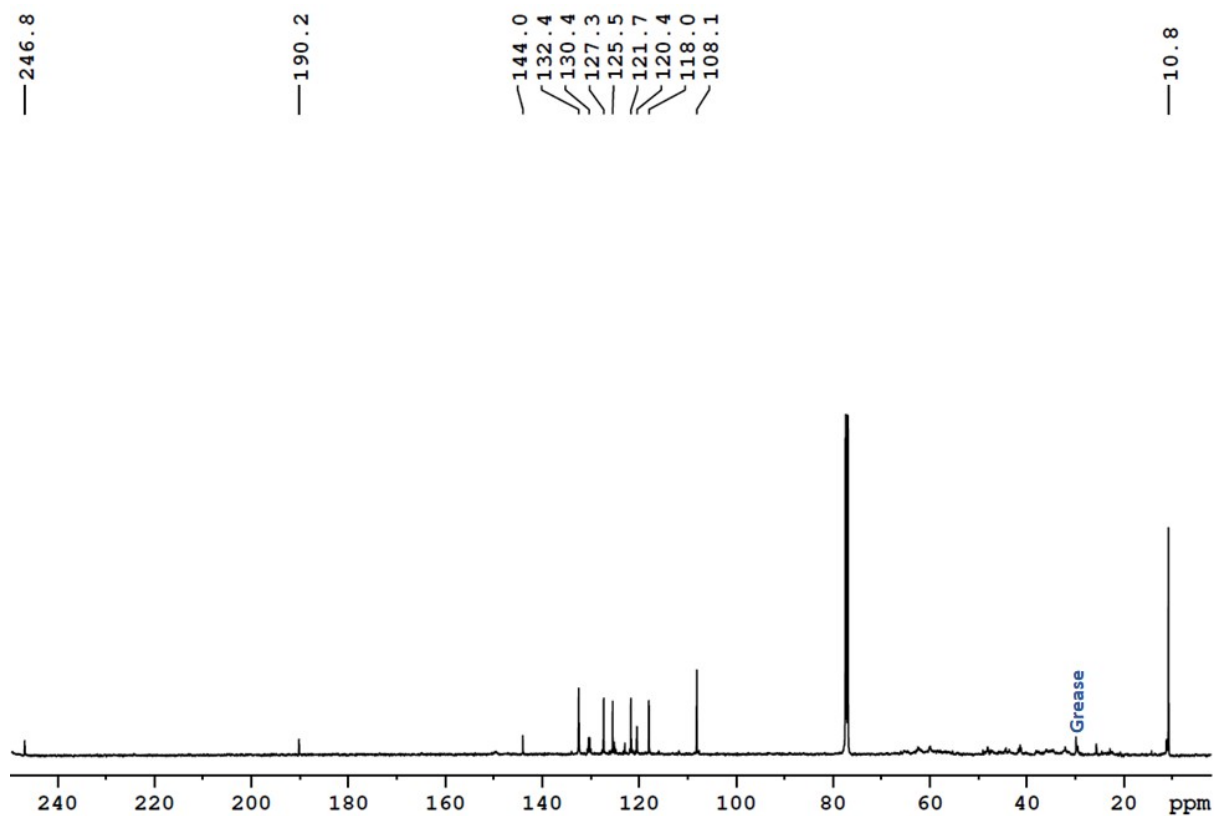

Figure S20.  $^{13}\text{C}\{^1\text{H}\}$  NMR spectrum of compound **7** in  $\text{C}_6\text{D}_6$

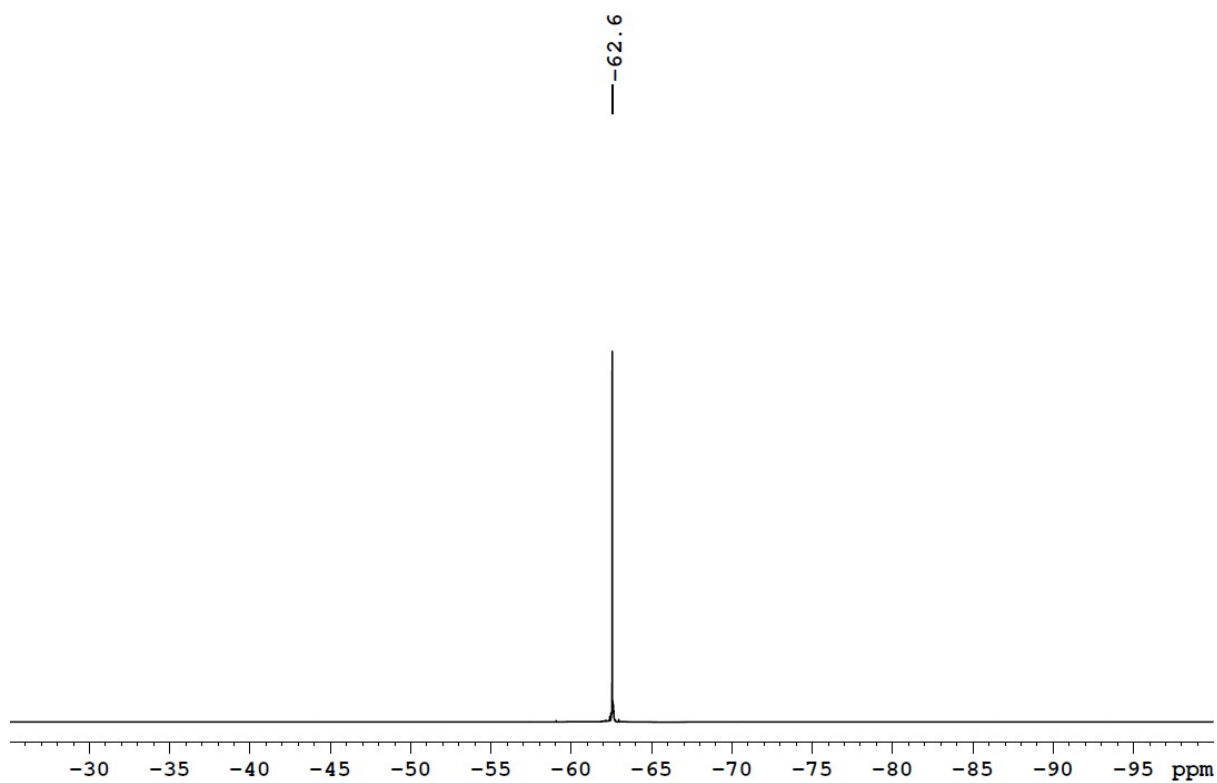

**Figure S21.**  $^{19}\text{F}$  NMR spectrum of compound **7** in  $\text{C}_6\text{D}_6$

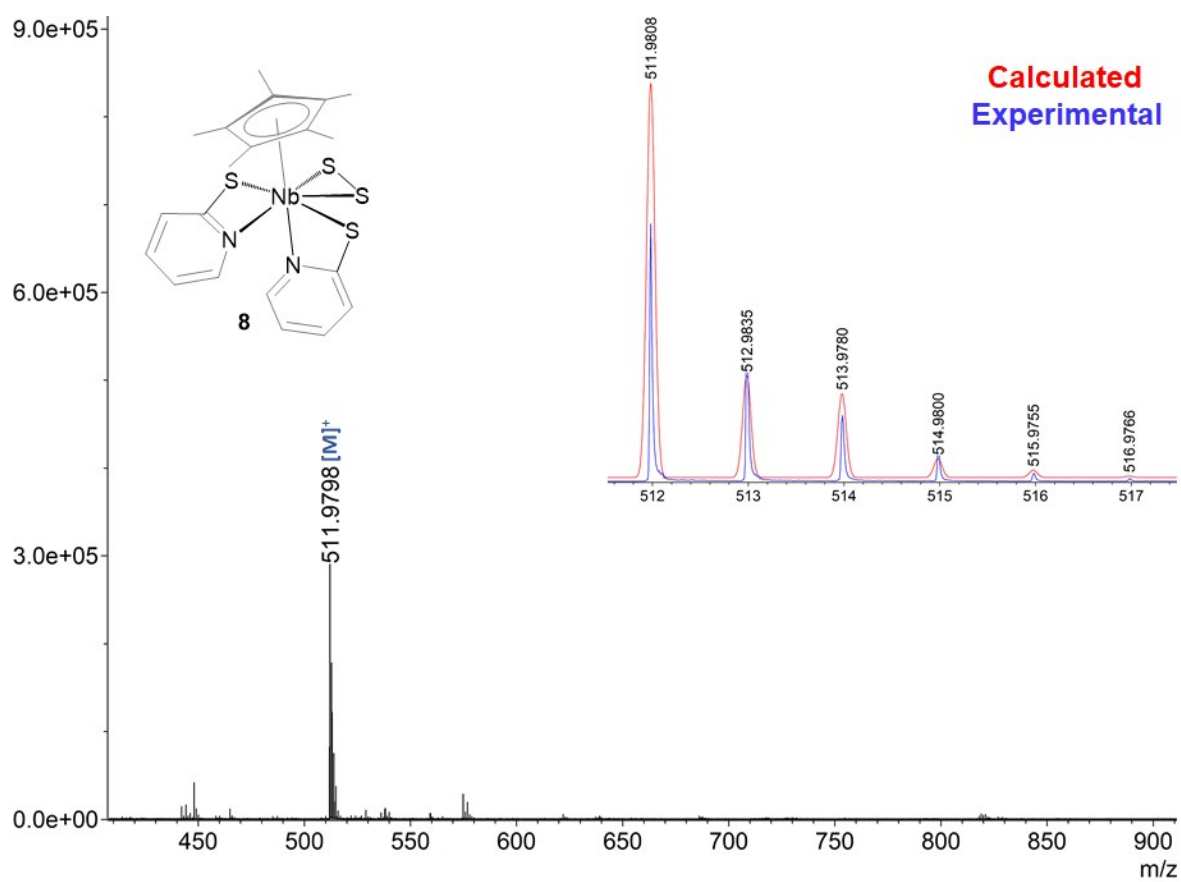

**Figure S22.** ESI-MS of compound **8**

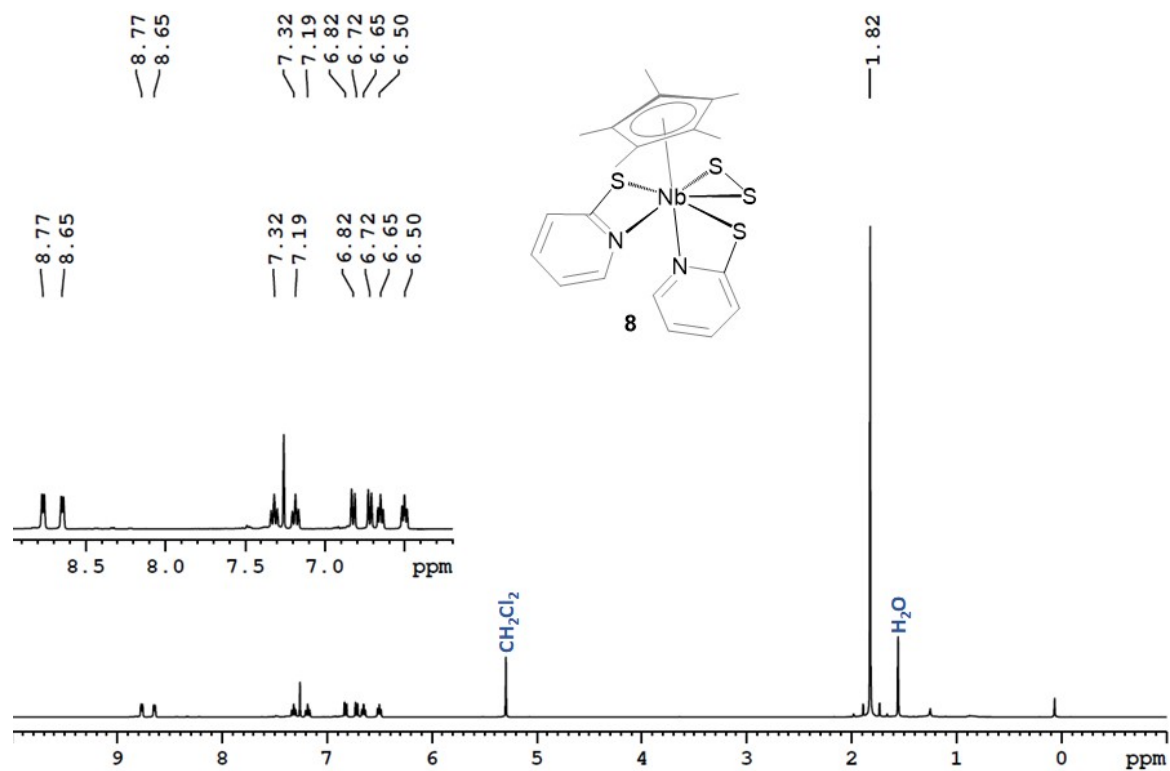

Figure S23.  $^1\text{H}$  NMR spectrum of compound **8** in  $\text{CDCl}_3$

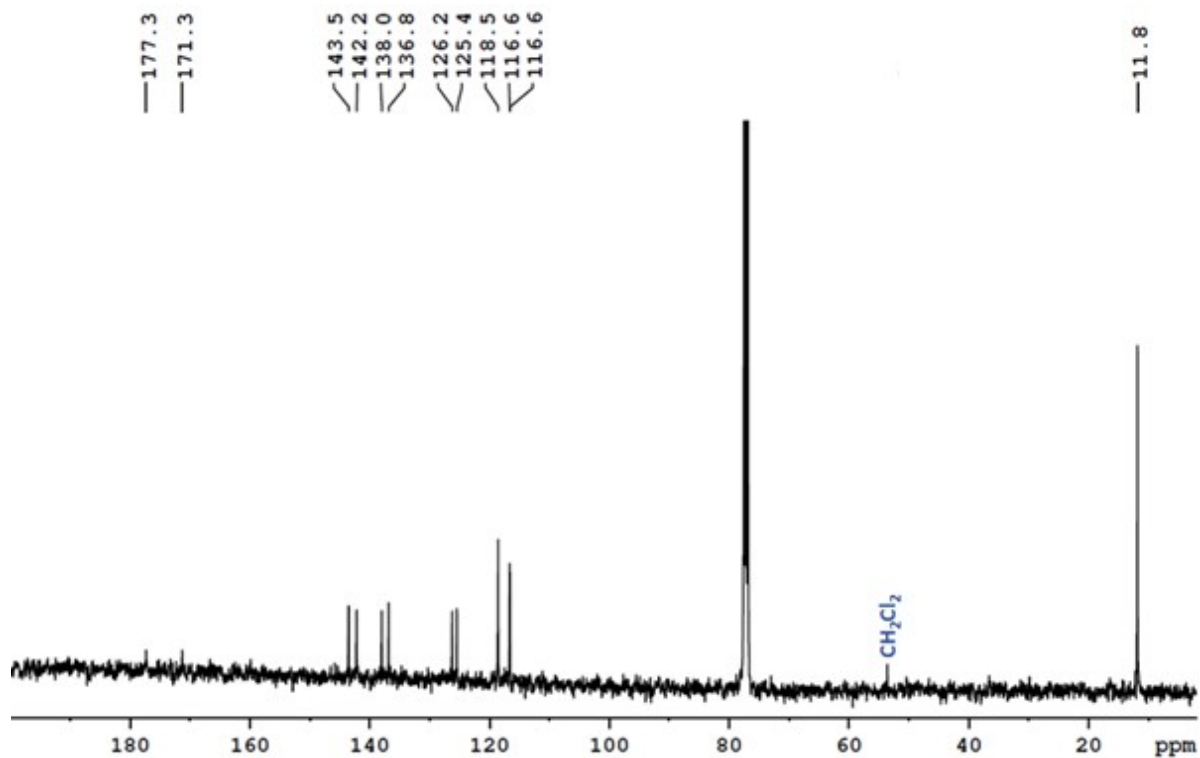

Figure S24.  $^{13}\text{C}\{^1\text{H}\}$  NMR spectrum of compound **8** in  $\text{CDCl}_3$ .

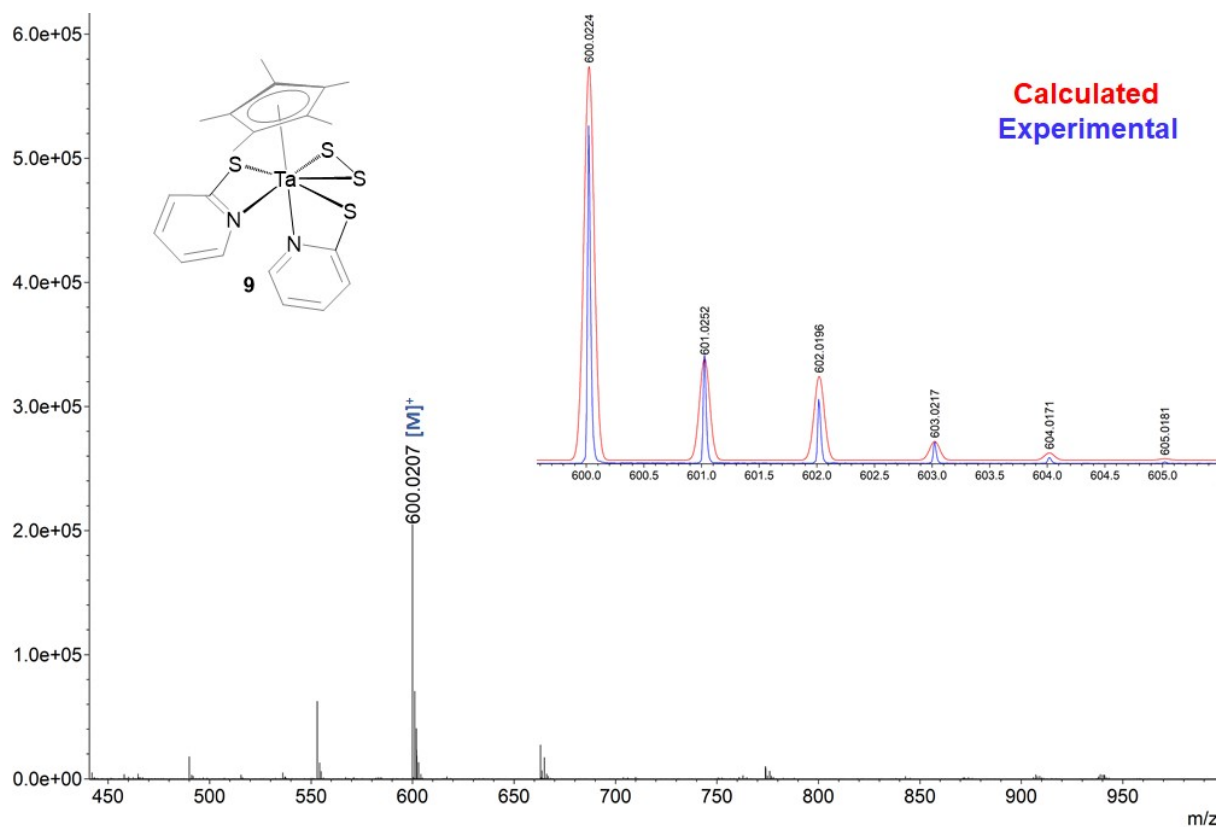

Figure S25. ESI-MS of compound **9**

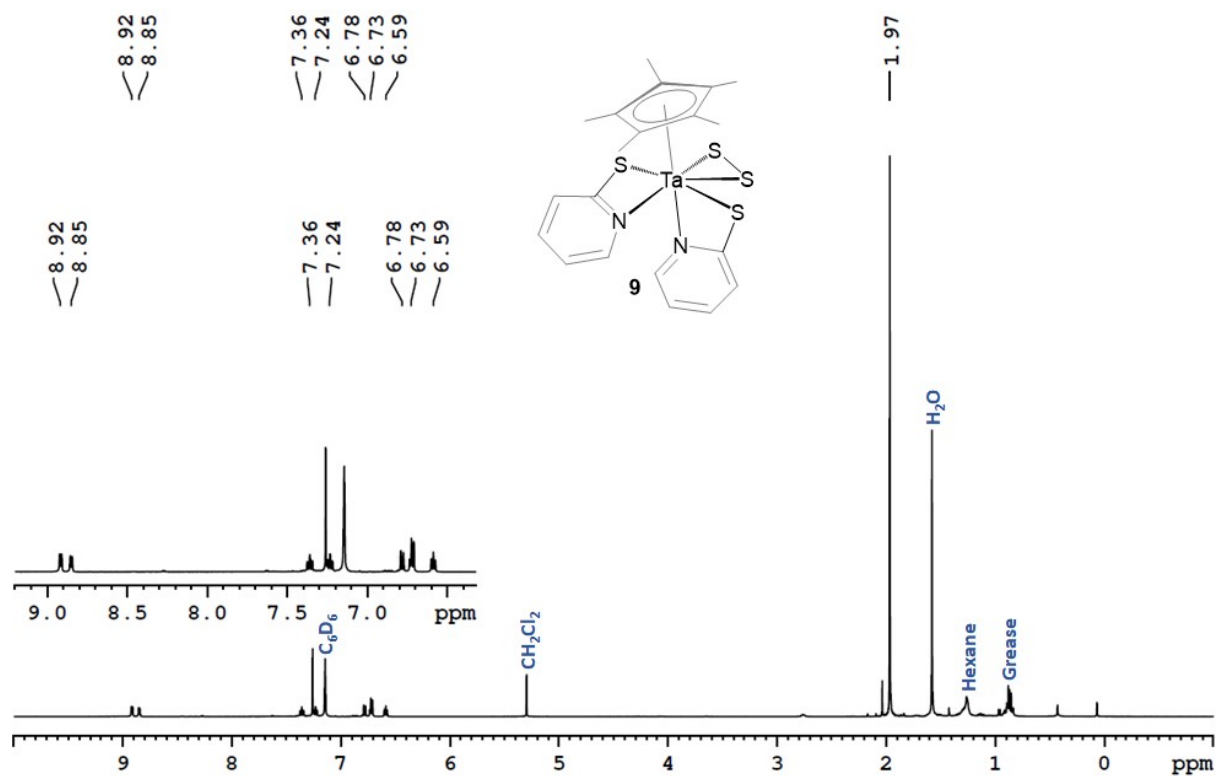

Figure S26.  $^1\text{H}$  NMR spectrum of compound **9** in  $\text{CDCl}_3$



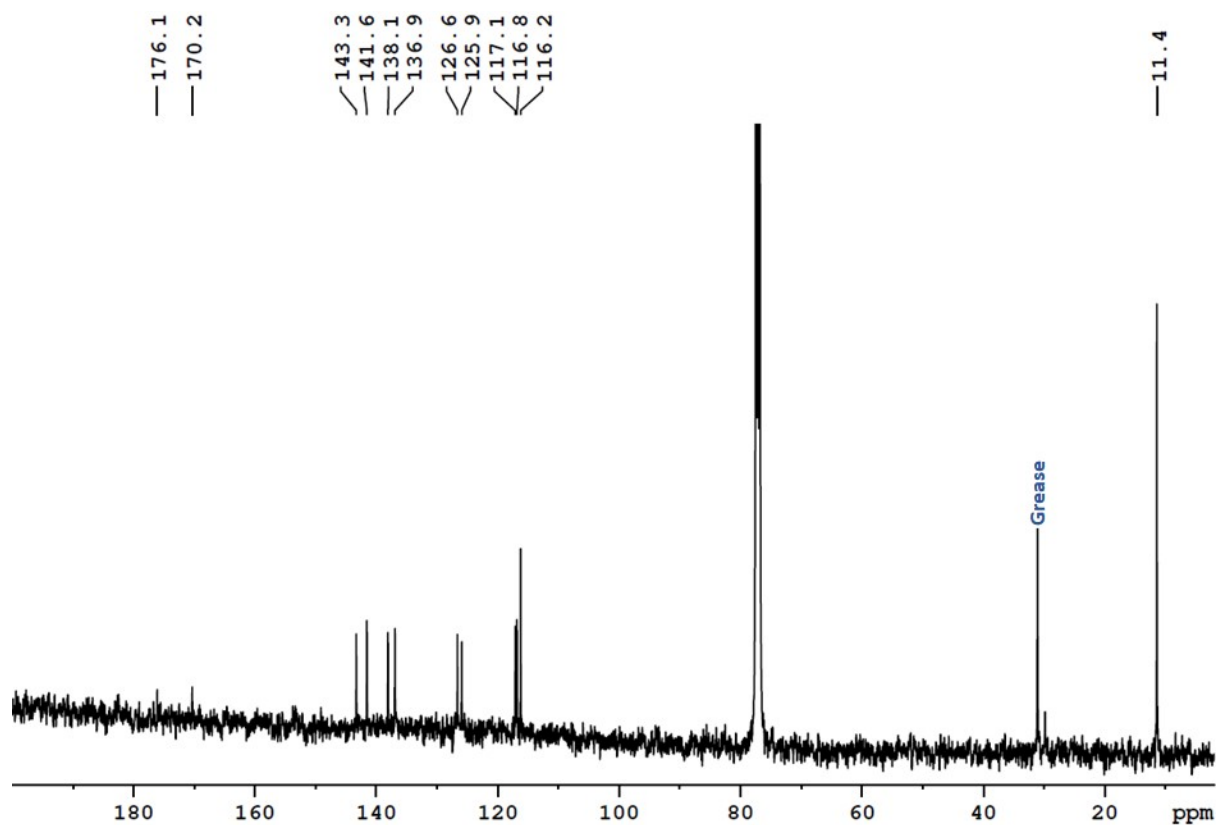

Figure S27.  $^{13}\text{C}\{^1\text{H}\}$  NMR spectrum of compound **9** in  $\text{CDCl}_3$

## II Computational data

**Table S1.** Experimental and DFT calculated (B3LYP/Def2-TZVP) NMR chemical shifts  $\delta$  (ppm) for compounds **3**, **4**, **6** and **7**.

| Comp.    | <sup>11</sup> B NMR |       |
|----------|---------------------|-------|
|          | Exp.                | Calc. |
| <b>3</b> | 19.6                | 16.9  |
| <b>4</b> | 18                  | 15.8  |
| <b>6</b> | -15.5               | -13.6 |
| <b>7</b> | -10.7               | -11   |

**Table S2.** Calculated natural charges (q), natural valence population (Pop) and HOMO–LUMO gaps of complexes **1-3**, **5,6** and **9**.

| Comp.    | q <sub>M</sub> | q <sub>N</sub> | q <sub>B</sub> | Pop(M <sub>val</sub> ) | Pop(N <sub>val</sub> ) | Pop(B <sub>val</sub> ) | $\Delta E_{H-L}$ (eV) |
|----------|----------------|----------------|----------------|------------------------|------------------------|------------------------|-----------------------|
| <b>1</b> | -0.725         | -0.360         |                | 8.707                  | 5.318                  |                        | 2.249                 |
| <b>2</b> | -0.754         | -0.468         | -0.004         | 8.735                  | 5.441                  | 2.979                  | 2.331                 |
| <b>3</b> | -0.755         | -0.486         | 0.261          | 8.736                  | 5.459                  | 2.708                  | 2.307                 |
| <b>5</b> | -0.854         | -0.399         |                | 6.937                  | 5.364                  |                        | 1.237                 |
| <b>6</b> | -1.027         | -0.454         | 0.173          | 7.037                  | 5.426                  | 2.805                  | 2.014                 |
| <b>9</b> | 0.006          | -0.445         |                | 4.853                  | 5.404                  |                        | 1.339                 |

**Table S3.** Selected geometrical parameters and Wiberg bond indices (WBI) of **3** and **6**.

| <b>3</b> |           |          |       | <b>6</b> |           |          |       |
|----------|-----------|----------|-------|----------|-----------|----------|-------|
|          | Expt. (Å) | Cal. (Å) | WBI   |          | Expt. (Å) | Cal. (Å) | WBI   |
| Ru1-B1   | 2.229(10) | 2.238    | 0.455 | Mo1-B1   | 2.768     | 2.862    | 0.236 |
| Ru1-H1   | 1.75(6)   | 1.767    | 0.297 | Mo1-H1A  | 2.805     | 3.034    | 0.013 |
| Ru1-H2   | 1.83(7)   | 1.770    | 0.293 | Mo1-H1B  | 1.84(6)   | 1.861    | 0.326 |
| B1-H1    | 1.27(6)   | 1.337    | 0.561 | B1-H1A   | 1.075     | 1.262    | 0.931 |
| B1-H2    | 1.31(7)   | 1.340    | 0.565 | B1-H1B   | 1.23(6)   | 1.302    | 0.545 |

**Table S4.** Topological parameters of **1**, **5** and **9**.

| Comp.    | Electron density ( $\rho(r)$ ) | Total energy density(H(r)) | Laplacian of the electron density ( $\nabla^2(r)$ ) |
|----------|--------------------------------|----------------------------|-----------------------------------------------------|
| <b>1</b> | 0.0808                         | -0.0139                    | 0.313                                               |
| <b>5</b> | 0.1122                         | -0.0313                    | 0.460                                               |
| <b>9</b> | 0.0652                         | -0.0133                    | 0.171                                               |

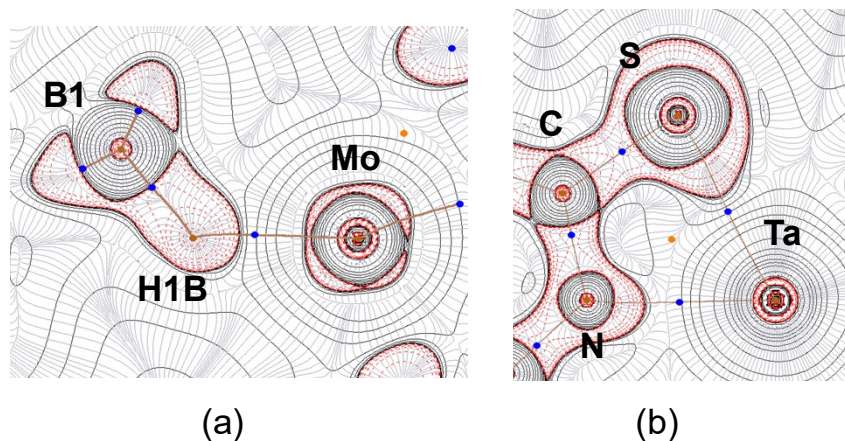

**Figure S28.** Contour-line map of the Laplacian of the electron density in the Mo-H-B plane of **6** (a), and Contour-line map of the Laplacian of the electron density in the Ta-N-C-S plane of **9** (b). The solid brown lines are bond paths, whereas the orange and blue spheres indicate the ring and bond-critical points, respectively. Areas of charge concentration [ $\rho(r) < 0$ ] are meant for red lines and areas of charge depletion [ $\rho(r) > 0$ ] are shown by black lines.

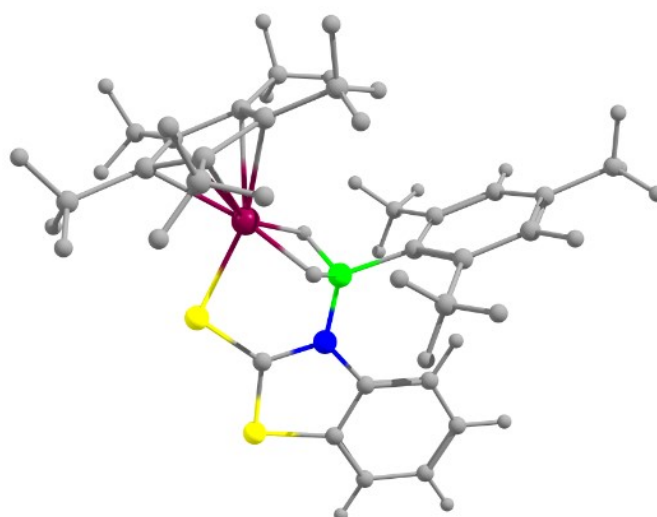

**Figure S29.** Optimized geometry of **3**.

Cartesian coordinates for the calculated structure of **3** (in Å).

|    |              |              |              |   |              |              |             |
|----|--------------|--------------|--------------|---|--------------|--------------|-------------|
| Ru | -1.651811000 | -0.331053000 | -0.002670000 | H | -4.291336000 | -2.732742000 | 0.094326000 |
| C  | -3.292291000 | 0.394270000  | 1.229591000  | C | -3.377116000 | 0.403872000  | 2.725995000 |
| C  | -2.818147000 | 1.494035000  | 0.400951000  | H | -2.565952000 | 0.995086000  | 3.172638000 |
| C  | -2.986490000 | 1.101172000  | -0.971177000 | H | -3.317322000 | -0.611554000 | 3.140195000 |
| C  | -3.584251000 | -0.225741000 | -1.006726000 | H | -4.332222000 | 0.846966000  | 3.059196000 |
| C  | -3.788323000 | -0.647207000 | 0.362770000  | C | -2.342693000 | 2.828967000  | 0.889448000 |
| C  | -4.470514000 | -1.908885000 | 0.799556000  | H | -1.895075000 | 2.756880000  | 1.890268000 |
| H  | -5.562221000 | -1.759518000 | 0.862765000  | H | -3.178894000 | 3.547431000  | 0.953433000 |
| H  | -4.121324000 | -2.236622000 | 1.788235000  | H | -1.582550000 | 3.257550000  | 0.222070000 |

|   |              |              |              |   |              |              |              |
|---|--------------|--------------|--------------|---|--------------|--------------|--------------|
| C | -2.701784000 | 1.954211000  | -2.170036000 | H | 0.278741000  | 1.305786000  | 2.721117000  |
| H | -3.599446000 | 2.529910000  | -2.456085000 | C | 3.149914000  | 5.408428000  | -0.012334000 |
| H | -2.410744000 | 1.346534000  | -3.038168000 | H | 3.790147000  | 5.562610000  | -0.893306000 |
| H | -1.895293000 | 2.673316000  | -1.972898000 | H | 3.756587000  | 5.582986000  | 0.888295000  |
| C | -4.052067000 | -0.946476000 | -2.235259000 | H | 2.369937000  | 6.188117000  | -0.036105000 |
| H | -4.054528000 | -2.035226000 | -2.088761000 | C | 2.769679000  | -1.479183000 | 0.004073000  |
| H | -3.407384000 | -0.731544000 | -3.098766000 | C | 3.779655000  | -0.505773000 | 0.013050000  |
| H | -5.080082000 | -0.644253000 | -2.504263000 | H | 3.522272000  | 0.551137000  | 0.015628000  |
| C | 1.317674000  | 1.440540000  | -0.000641000 | C | 5.115662000  | -0.912419000 | 0.019199000  |
| C | 1.627304000  | 2.108725000  | 1.213492000  | H | 5.897609000  | -0.151182000 | 0.026266000  |
| C | 2.225139000  | 3.377286000  | 1.190622000  | C | 5.466767000  | -2.269449000 | 0.016854000  |
| H | 2.460914000  | 3.867709000  | 2.140731000  | H | 6.517503000  | -2.563921000 | 0.021925000  |
| C | 2.538815000  | 4.028260000  | -0.007934000 | C | 4.474421000  | -3.250712000 | 0.008719000  |
| C | 2.250772000  | 3.358492000  | -1.202859000 | H | 4.732804000  | -4.310743000 | 0.007579000  |
| H | 2.507739000  | 3.833514000  | -2.155325000 | C | 3.137461000  | -2.845852000 | 0.002680000  |
| C | 1.654029000  | 2.089432000  | -1.218471000 | C | 0.679793000  | -2.461566000 | -0.006277000 |
| C | 1.414016000  | 1.423742000  | -2.555707000 | S | 1.719546000  | -3.870726000 | -0.005554000 |
| H | 0.341051000  | 1.260965000  | -2.743908000 | S | -1.004980000 | -2.536923000 | -0.006126000 |
| H | 1.895445000  | 0.434533000  | -2.610905000 | N | 1.372005000  | -1.279894000 | -0.002495000 |
| H | 1.812264000  | 2.037050000  | -3.376482000 | B | 0.551801000  | 0.034675000  | 0.000822000  |
| C | 1.356060000  | 1.466263000  | 2.555992000  | H | -0.269240000 | -0.017544000 | -1.057468000 |
| H | 1.734849000  | 2.093716000  | 3.375257000  | H | -0.266463000 | -0.026787000 | 1.056894000  |
| H | 1.834881000  | 0.477819000  | 2.639908000  |   |              |              |              |

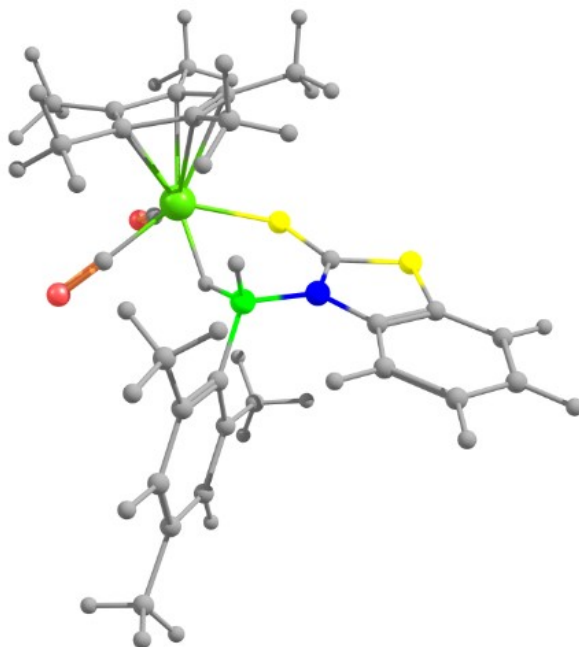

**Figure S30.** Optimized geometry of **6**.

Cartesian coordinates for the calculated structure of **6** (in Å)

|   |              |              |             |   |              |              |             |
|---|--------------|--------------|-------------|---|--------------|--------------|-------------|
| C | -3.512141000 | -1.297527000 | 1.226157000 | H | -3.385493000 | -0.290232000 | 1.619416000 |
|---|--------------|--------------|-------------|---|--------------|--------------|-------------|

|   |              |              |              |    |              |              |              |
|---|--------------|--------------|--------------|----|--------------|--------------|--------------|
| C | -4.638527000 | -2.059178000 | 1.537719000  | C  | 3.829439000  | -0.711088000 | 0.284238000  |
| H | -5.395455000 | -1.639379000 | 2.202180000  | C  | 4.785271000  | -1.411212000 | -0.639137000 |
| C | -4.818025000 | -3.347587000 | 1.009542000  | H  | 5.168285000  | -0.736655000 | -1.415844000 |
| H | -5.709340000 | -3.921988000 | 1.266880000  | H  | 4.311224000  | -2.264756000 | -1.143349000 |
| C | -3.864941000 | -3.904022000 | 0.154541000  | H  | 5.652277000  | -1.798696000 | -0.076593000 |
| H | -3.996657000 | -4.905163000 | -0.258138000 | C  | 2.637794000  | -2.851173000 | 1.189420000  |
| C | -2.734884000 | -3.143857000 | -0.156228000 | H  | 3.461215000  | -3.352807000 | 1.725914000  |
| C | -2.548815000 | -1.843916000 | 0.366212000  | H  | 2.585200000  | -3.284307000 | 0.180293000  |
| C | -0.617999000 | -2.024828000 | -0.850158000 | H  | 1.703237000  | -3.099910000 | 1.709572000  |
| C | -2.060195000 | 1.368835000  | 0.076711000  | C  | 1.366470000  | -0.671438000 | 3.149833000  |
| C | -2.453792000 | 2.285857000  | 1.091427000  | H  | 0.725837000  | -1.543499000 | 2.962420000  |
| C | -3.422463000 | 3.264112000  | 0.825896000  | H  | 0.709690000  | 0.183895000  | 3.354935000  |
| H | -3.711510000 | 3.952245000  | 1.626995000  | H  | 1.944115000  | -0.874566000 | 4.068404000  |
| C | -4.023563000 | 3.394266000  | -0.430845000 | C  | 2.677603000  | 2.142491000  | 2.480334000  |
| C | -3.619381000 | 2.507896000  | -1.433396000 | H  | 1.644079000  | 2.239580000  | 2.839615000  |
| H | -4.060673000 | 2.595241000  | -2.431615000 | H  | 2.909484000  | 3.037905000  | 1.889345000  |
| C | -2.656804000 | 1.514357000  | -1.205144000 | H  | 3.337494000  | 2.147675000  | 3.364997000  |
| C | -2.282645000 | 0.620791000  | -2.366826000 | C  | 4.871166000  | 1.693891000  | 0.186328000  |
| H | -1.196637000 | 0.456043000  | -2.431031000 | H  | 5.768798000  | 1.662838000  | 0.827784000  |
| H | -2.612809000 | 1.062980000  | -3.317419000 | H  | 4.472494000  | 2.716475000  | 0.224201000  |
| H | -2.757818000 | -0.371369000 | -2.289082000 | H  | 5.193915000  | 1.503312000  | -0.845833000 |
| C | -1.853899000 | 2.261669000  | 2.482216000  | C  | 1.486757000  | 2.215433000  | -0.663510000 |
| H | -2.319206000 | 3.030146000  | 3.115926000  | C  | 2.523117000  | 0.637781000  | -2.119983000 |
| H | -0.770896000 | 2.459410000  | 2.456488000  | B  | -0.950299000 | 0.240234000  | 0.378003000  |
| H | -1.982615000 | 1.287433000  | 2.979082000  | N  | -1.358355000 | -1.234748000 | -0.054562000 |
| C | -5.036190000 | 4.479097000  | -0.704651000 | O  | 1.327872000  | 3.351514000  | -0.874932000 |
| H | -5.732609000 | 4.187001000  | -1.504065000 | O  | 3.020190000  | 0.855476000  | -3.157613000 |
| H | -4.540936000 | 5.410603000  | -1.026674000 | S  | 0.884034000  | -1.659487000 | -1.575286000 |
| H | -5.624063000 | 4.717484000  | 0.194024000  | S  | -1.372004000 | -3.577197000 | -1.162139000 |
| C | 2.872424000  | -1.372736000 | 1.144978000  | Mo | 1.820138000  | 0.303239000  | -0.339719000 |
| C | 2.296344000  | -0.400155000 | 2.007740000  | H  | -0.573713000 | 0.197774000  | 1.521902000  |
| C | 2.875972000  | 0.882051000  | 1.687264000  | H  | -0.014505000 | 0.593128000  | -0.454911000 |
| C | 3.861043000  | 0.683397000  | 0.649898000  |    |              |              |              |

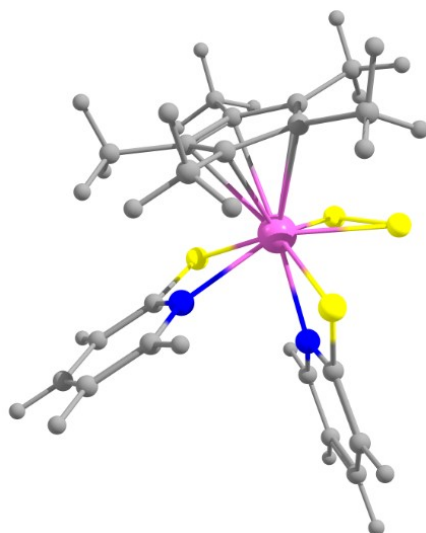

**Figure S31.** Optimized geometry of **9**

Cartesian coordinates for the calculated structure of **9** (in Å).

|    |              |              |              |   |              |              |              |
|----|--------------|--------------|--------------|---|--------------|--------------|--------------|
| Ta | 0.359261000  | -0.216715000 | -0.110259000 | H | 2.287869000  | 2.081819000  | -2.480497000 |
| S  | -0.475472000 | 1.152900000  | -2.157486000 | H | 3.969852000  | 1.878811000  | -1.932674000 |
| S  | -0.747374000 | -1.104704000 | 2.111027000  | H | 3.075394000  | 0.491858000  | -2.604195000 |
| S  | 0.958205000  | -1.652328000 | -2.040084000 | C | 1.079294000  | 1.786354000  | 2.798983000  |
| S  | 0.967527000  | -2.625164000 | -0.208190000 | H | 0.329557000  | 2.562487000  | 2.597436000  |
| N  | -1.273558000 | 1.417864000  | 0.263724000  | H | 0.619194000  | 1.032392000  | 3.452473000  |
| N  | -1.658743000 | -1.233731000 | -0.288945000 | H | 1.895550000  | 2.263719000  | 3.368134000  |
| C  | 1.721228000  | 1.860626000  | 0.266701000  | C | 3.885226000  | -1.144637000 | -0.364293000 |
| C  | -1.986841000 | -1.570678000 | 0.987595000  | H | 4.011621000  | -1.960216000 | 0.356573000  |
| C  | -3.189241000 | -2.242390000 | 1.266314000  | H | 3.544181000  | -1.580728000 | -1.317180000 |
| H  | -3.431897000 | -2.505440000 | 2.296023000  | H | 4.869840000  | -0.678185000 | -0.538023000 |
| C  | -2.002456000 | 1.871362000  | 1.304484000  | C | -3.193480000 | 3.390438000  | -0.129366000 |
| H  | -1.802328000 | 1.392450000  | 2.263966000  | H | -3.947440000 | 4.166545000  | -0.278135000 |
| C  | 2.510994000  | 1.038674000  | -0.602981000 | C | -2.966663000 | 2.860457000  | 1.152818000  |
| C  | -2.459282000 | 2.918894000  | -1.208316000 | H | -3.534539000 | 3.201782000  | 2.017976000  |
| H  | -2.613970000 | 3.295503000  | -2.219818000 | C | 2.630315000  | -1.001775000 | 2.553531000  |
| C  | 2.920138000  | -0.115678000 | 0.128423000  | H | 2.572117000  | -2.040876000 | 2.196576000  |
| C  | 2.356658000  | -0.036247000 | 1.441823000  | H | 3.643501000  | -0.839223000 | 2.958935000  |
| C  | -4.026507000 | -2.572041000 | 0.205801000  | H | 1.918413000  | -0.889313000 | 3.381641000  |
| H  | -4.961849000 | -3.102890000 | 0.395965000  | C | -3.665080000 | -2.229521000 | -1.107230000 |
| C  | -2.468780000 | -1.553266000 | -1.316652000 | H | -4.300135000 | -2.484129000 | -1.955288000 |
| H  | -2.115750000 | -1.257512000 | -2.304999000 | C | 1.305489000  | 3.271923000  | -0.019801000 |
| C  | 1.624147000  | 1.190599000  | 1.534731000  | H | 0.999332000  | 3.399500000  | -1.067194000 |
| C  | -1.489210000 | 1.920959000  | -0.984710000 | H | 0.475374000  | 3.599166000  | 0.620293000  |
| C  | 2.980435000  | 1.392113000  | -1.979887000 | H | 2.151755000  | 3.955467000  | 0.165392000  |
